# Supplementary material
Source: PubMed Central journal article supplement (PMC4692978)
Supplement: supp_kwv107_kwv107supp.pdf [file supp_kwv107_kwv107supp.pdf]

Web Table 1. Difference in the distribution of body mass index between Japan and the U.S. (%)

|                     | Japan <sup>a</sup> |        |      | U.S. <sup>b</sup> |        |      |
|---------------------|--------------------|--------|------|-------------------|--------|------|
|                     | Total (15y+)       | 65–74y | 75y+ | Total (18y+)      | 65–74y | 75y+ |
| <b>Both genders</b> |                    |        |      |                   |        |      |
| <18.5               | 8.2                | 6.3    | 10.3 | 1.7               | 1.2    | 3.6  |
| 18.5–24.9           | 67.1               | 65.7   | 65.7 | 35.6              | 29.6   | 42.1 |
| 25.0–29.9           | 20.8               | 24.7   | 21.7 | 34.9              | 38.7   | 36.6 |
| 30.0+               | 3.9                | 3.4    | 2.3  | 27.7              | 30.5   | 17.7 |
| <b>Male</b>         |                    |        |      |                   |        |      |
| <18.5               | 5.2                | 3.6    | 8.9  | 0.9               | 0.6    | 1.5  |
| 18.5–24.9           | 65.3               | 67.1   | 68.4 | 29.5              | 24.3   | 38.8 |
| 25.0–29.9           | 25.0               | 27.1   | 20.5 | 41.7              | 45.2   | 43.4 |
| 30.0+               | 4.4                | 2.2    | 2.3  | 27.8              | 29.8   | 16.4 |
| <b>Female</b>       |                    |        |      |                   |        |      |
| <18.5               | 10.6               | 8.4    | 11.4 | 2.5               | 1.7    | 5.1  |
| 18.5–24.9           | 68.6               | 64.5   | 63.7 | 41.5              | 34.3   | 44.4 |
| 25.0–29.9           | 17.3               | 22.8   | 22.6 | 28.4              | 33.0   | 31.9 |
| 30.0+               | 3.5                | 4.3    | 2.3  | 27.5              | 31.1   | 18.6 |

<sup>a</sup>Source: National Health and Nutrition Survey, Japan, 2011.

<sup>b</sup>Source: National Health Interview Survey, the U.S., 2008–2010.

Web Table 2. The number of the participants at each wave, the National Survey of the Japanese Elderly, 1987–2006

|                                 | Wave 1<br>(1987) | Wave 2<br>(1990) | Wave 3<br>(1993) | Wave 4<br>(1996) | Wave 5<br>(1999) | Wave 6<br>(2002) | Wave 7<br>(2006) | Total<br>observations |
|---------------------------------|------------------|------------------|------------------|------------------|------------------|------------------|------------------|-----------------------|
| Entry wave                      |                  |                  |                  |                  |                  |                  |                  |                       |
| Wave 1 (year of 1987)           | 2,200            | 1,671            | 1,532            | 1,247            | 1,005            | 788              | 525              | 8,968                 |
| Wave 2 (year of 1990)           |                  | 366              | 309              | 284              | 263              | 232              | 191              | 1,645                 |
| Wave 4 (year of 1996)           |                  |                  |                  | 898              | 751              | 686              | 592              | 2,927                 |
| Wave 5 (year of 1999)           |                  |                  |                  |                  | 1,405            | 1,012            | 712              | 3,129                 |
| Total participants at each wave | 2,200            | 2,037            | 1,841            | 2,429            | 3,424            | 2,718            | 2,020            | 16,669                |

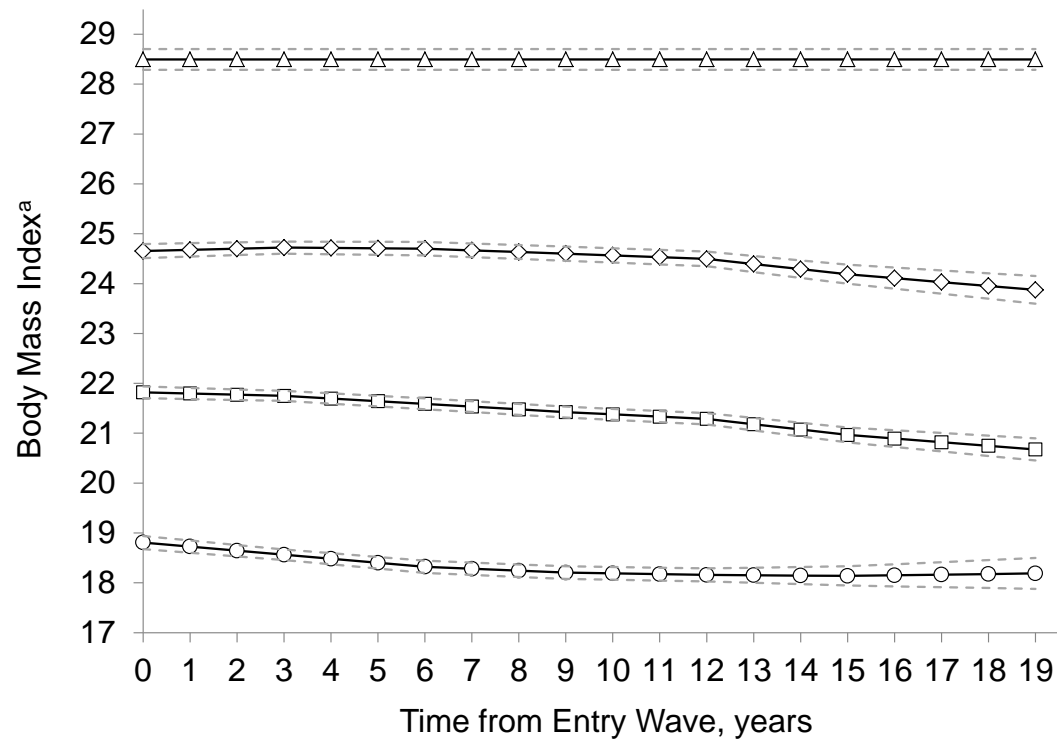

Web Figure 1.

Body mass index trajectories for four-group model with quadratic function over 19 years, the National Survey of the Japanese Elderly, 1987–2006

Solid lines, mean values of body mass index for members in the groups. Dashed lines, 95% confidence intervals. The trajectories are as follows: circles, low-normal weight, decreasing; squares, mid-normal weight, decreasing; diamonds, high-normal weight, decreasing; and triangles, overweight, stable.

<sup>a</sup>weight (kg)/height (m)<sup>2</sup>.

Web Table 3. Estimates of growth curves parameters for body mass index trajectories with non-imputed dataset, the National Survey of the Japanese Elderly, 1987–2006

|                                        | Low-normal weight,<br>decreasing |              | Mid-normal weight,<br>decreasing |              | High-normal weight,<br>decreasing |              | Overweight, stable |            |
|----------------------------------------|----------------------------------|--------------|----------------------------------|--------------|-----------------------------------|--------------|--------------------|------------|
|                                        | Estimate                         | 95% CI       | Estimate                         | 95% CI       | Estimate                          | 95% CI       | Estimate           | 95% CI     |
| Intercept                              | 18.8                             | 18.7, 18.9   | 21.9                             | 21.8, 22.0   | 24.9                              | 24.7, 25.0   | 28.9               | 28.6, 29.1 |
| Linear slope                           | -0.06                            | -0.07, -0.04 | -0.04                            | -0.05, -0.04 | -0.02                             | -0.03, -0.01 | -                  |            |
| Group membership                       | 23.3%                            |              | 44.3%                            |              | 27.1%                             |              | 5.3%               |            |
| Average group probability <sup>a</sup> | 0.870                            |              | 0.808                            |              | 0.867                             |              | 0.901              |            |

CI, confidence interval.

<sup>a</sup>Average group probability indicates the posterior probability of membership among the cases in each trajectory group.

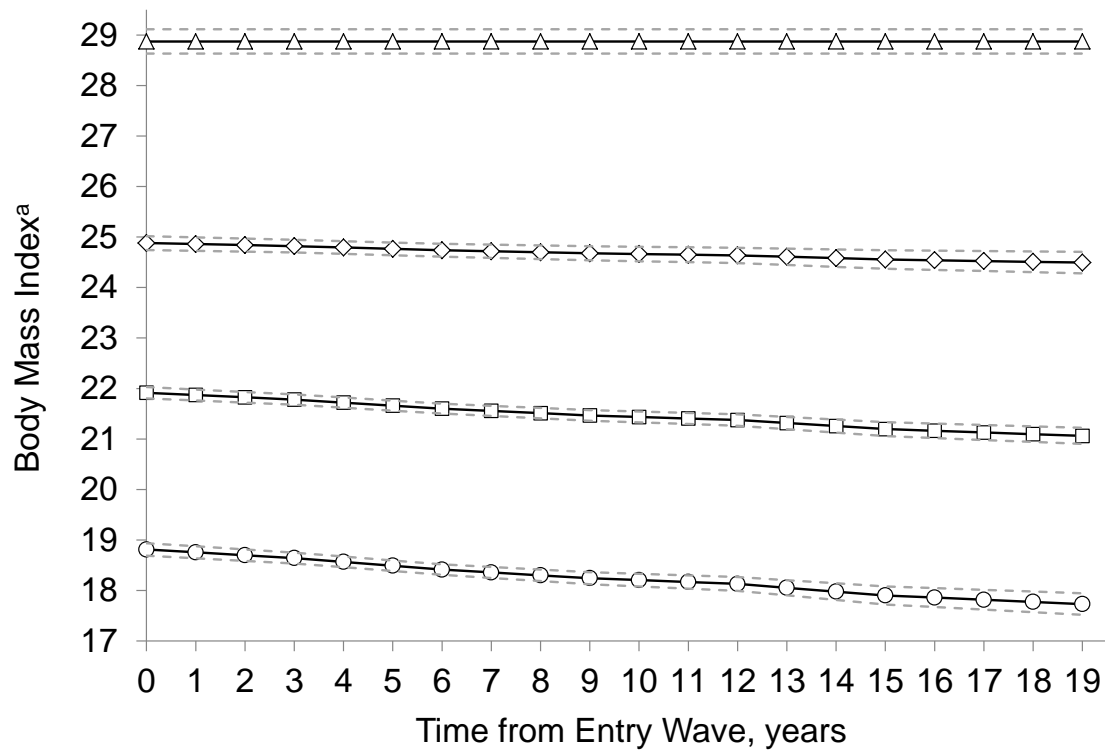

Web Figure 2.

Body mass index trajectories for four-group model over 19 years with non-imputed dataset, the National Survey of the Japanese Elderly, 1987–2006

Solid lines, mean values of body mass index for members in the groups. Dashed lines, 95% confidence intervals. The trajectories are as follows: circles, low-normal weight, decreasing; squares, mid-normal weight, decreasing; diamonds, high-normal weight, decreasing; and triangles, overweight, stable.

<sup>a</sup>weight (kg)/height (m)<sup>2</sup>.

Web Table 4. Association between body mass index trajectories and all-cause mortality, stratified by smoking status, frequency of exercise, and history of diseases, the National Survey of the Japanese Elderly, 1987–2006

|                                | <b>Model 2b</b>                  |            |                              |            | <b>Model 2c</b>                                              |            |                                                            |            | <b>Model 2d</b>                                                                                           |            |                                                                                                           |            |
|--------------------------------|----------------------------------|------------|------------------------------|------------|--------------------------------------------------------------|------------|------------------------------------------------------------|------------|-----------------------------------------------------------------------------------------------------------|------------|-----------------------------------------------------------------------------------------------------------|------------|
|                                | Non-current smokers <sup>a</sup> |            | Current smokers <sup>a</sup> |            | Physically active individuals (often/sometimes) <sup>b</sup> |            | Physically inactive individuals (rarely/none) <sup>b</sup> |            | No history of cardiovascular disease, stroke, lung disease, liver disease and kidney disease <sup>c</sup> |            | Any history of cardiovascular disease, stroke, lung disease, liver disease or kidney disease <sup>c</sup> |            |
|                                | n=3,674                          |            | n=1,195                      |            | n=2,336                                                      |            | n=2,533                                                    |            | n=3,868                                                                                                   |            | n=1,001                                                                                                   |            |
|                                | HR                               | 95% CI     | HR                           | 95% CI     | HR                                                           | 95% CI     | HR                                                         | 95% CI     | HR                                                                                                        | 95% CI     | HR                                                                                                        | 95% CI     |
| Low-normal weight, decreasing  | 1.06                             | 0.94, 1.21 | 1.41                         | 0.99, 2.01 | 1.30                                                         | 1.09, 1.57 | 1.09                                                       | 0.93, 1.29 | 1.18                                                                                                      | 1.01, 1.38 | 1.10                                                                                                      | 0.87, 1.40 |
| Mid-normal weight, decreasing  | 1.00                             | Reference  | 1.00                         | Reference  | 1.00                                                         | Reference  | 1.00                                                       | Reference  | 1.00                                                                                                      | Reference  | 1.00                                                                                                      | Reference  |
| High-normal weight, decreasing | 0.82                             | 0.69, 0.96 | 0.79                         | 0.62, 1.02 | 0.85                                                         | 0.70, 1.02 | 0.81                                                       | 0.68, 0.96 | 0.80                                                                                                      | 0.70, 0.93 | 0.85                                                                                                      | 0.59, 1.22 |
| Overweight, stable             | 0.84                             | 0.57, 1.22 | 0.42                         | 0.22, 0.79 | 0.75                                                         | 0.48, 1.19 | 0.69                                                       | 0.49, 0.97 | 0.69                                                                                                      | 0.47, 1.01 | 0.79                                                                                                      | 0.48, 1.30 |

CI, confidence interval. HR, hazard ratio.

<sup>a</sup>Adjusted for age, gender, marital status, current working, education, annual household income, weight (kg), number of drinking days per month, frequency of exercise, history of cardiovascular disease, stroke, lung disease, liver disease and kidney disease, self-rated health and functional status at baseline, and entry wave.

<sup>b</sup>Adjusted for age, gender, marital status, current working, education, annual household income, weight (kg), number of cigarettes smoked per day, number of drinking days per month, history of cardiovascular disease, stroke, lung disease, liver disease and kidney disease, self-rated health and functional status at baseline, and entry wave.

<sup>c</sup>Adjusted for age, gender, marital status, current working, education, annual household income, weight (kg), number of cigarettes smoked per day, number of drinking days per month, frequency of exercise, self-rated health and functional status at baseline, and entry wave.
